# Supplementary material for: Spin-crossover between high-spin (S = 5/2) and low-spin (S = 1/2) states in six-coordinate iron(iii) porphyrin complexes having two pyridine-N oxide derivatives
Source: Royal Society of Chemistry journal article supplement (doi:10.1039/c6dt03859j), 2016-11-28
Supplement: c6dt03859j1.pdf [file c6dt03859j1.pdf]

## Supporting Information

### Spin-crossover system between $S=5/2$ and $S=1/2$ states observed in the iron (III) porphyrin complexes axially coordinated two pyridine-N oxide derivatives

Yuki Ide,<sup>a</sup> Nami Murai,<sup>a</sup> Hiroki Ishimae,<sup>a</sup> Masaaki Suzuki,<sup>a</sup> Shigeki Mori,<sup>\*b</sup> Masashi Takahashi,<sup>\*c</sup> Mikio Nakamura,<sup>\*c</sup> Katsumi Yoshino,<sup>d</sup> and Takahisa Ikeue<sup>\*a</sup>

- a.* Department of Chemistry, Interdisciplinary Graduate School of Science and Engineering, Shimane University, 1060 Nishikawatsu, Matsue 690-8504, Japan.  
*b.* Advanced Reserch Support Center, Ehime University, 2-5, Bunkyo-cho, Matsuyama, 790-8577, Japan.  
*c.* Department of Chemistry, Faculty of Science, Toho University, Funabashi 274-8510, Japan  
*d.* Shimane Institute for Industrial Technology, 1 Hokuryo, Matsue, Shimane 690-0816, Japan

E-mail: ikeue@riko.shimane-u.ac.jp

#### Table of Contents

|                                                  |       |
|--------------------------------------------------|-------|
| Crystallographic data: Table S1.....             | S2    |
| Curie plots: Fig. S1-S6.....                     | S3-S5 |
| EPR g values: Table S2.....                      | S6    |
| Van't Hoff plots: Fig. S7.....                   | S6    |
| <sup>57</sup> Fe Mössbauer spectra: Fig. S8..... | S6    |
| ORTEP drawings: Fig. S9-S11.....                 | S7-S8 |
| Crystal packing diagrams: Fig. S12-S15.....      | S8-S9 |
| Spin crossover system: Scheme S1.....            | S9    |

**Spin-crossover system between  $S=5/2$  and  $S=1/2$  states observed in the iron (III) porphyrin complexes axially coordinated two pyridine-*N* oxide derivatives**

Table S1 Crystallographic data of **1a-e** and **2**.

| Compound                                   | <b>1a</b> · 2CH <sub>2</sub> Cl <sub>2</sub>                                                                                          | <b>1c</b>                                                                       | <b>1e</b>                                                                       | <b>1e</b> · 2 toluene                                                                                               | <b>2</b> · CH <sub>2</sub> Cl <sub>2</sub> + 2.5 toluene                                                                                                |
|--------------------------------------------|---------------------------------------------------------------------------------------------------------------------------------------|---------------------------------------------------------------------------------|---------------------------------------------------------------------------------|---------------------------------------------------------------------------------------------------------------------|---------------------------------------------------------------------------------------------------------------------------------------------------------|
| Temperature (K)                            | 100(2)                                                                                                                                | 300(2)                                                                          | 100(2)                                                                          | 100(2)                                                                                                              | 100(2)                                                                                                                                                  |
| Chemical formula                           | C <sub>64</sub> H <sub>66</sub> N <sub>4</sub> O <sub>2</sub> Cl <sub>2</sub> FeBF <sub>4</sub> · 2(CH <sub>2</sub> Cl <sub>2</sub> ) | C <sub>68</sub> H <sub>68</sub> N <sub>4</sub> O <sub>2</sub> FeBF <sub>4</sub> | C <sub>68</sub> H <sub>68</sub> N <sub>4</sub> O <sub>2</sub> FeBF <sub>4</sub> | C <sub>70</sub> H <sub>72</sub> N <sub>4</sub> O <sub>2</sub> FeBF <sub>4</sub> · 2(C <sub>7</sub> H <sub>8</sub> ) | C <sub>78</sub> H <sub>78</sub> N <sub>4</sub> O <sub>2</sub> FeBF <sub>4</sub> · CH <sub>2</sub> Cl <sub>2</sub> · 2.5(C <sub>7</sub> H <sub>8</sub> ) |
| Formula weight                             | 1352.61                                                                                                                               | 1141.92                                                                         | 1141.92                                                                         | 1384.28                                                                                                             | 1706.80                                                                                                                                                 |
| Crystal size (mm)                          | 0.15 x 0.15 x 0.10                                                                                                                    | 0.25 x 0.10 x 0.08                                                              | 0.50 x 0.40 x 0.40                                                              | 0.20 x 0.05 x 0.02                                                                                                  | 0.18 x 0.06 x 0.02                                                                                                                                      |
| Crystal color                              | brown                                                                                                                                 | brown                                                                           | brown                                                                           | black                                                                                                               | black                                                                                                                                                   |
| Crystal system                             | Triclinic                                                                                                                             | Monoclinic                                                                      | Monoclinic                                                                      | Triclinic                                                                                                           | Triclinic                                                                                                                                               |
| Space group                                | P $\bar{1}$                                                                                                                           | C <sub>2</sub> /c                                                               | C <sub>2</sub> /c                                                               | P $\bar{1}$                                                                                                         | P $\bar{1}$                                                                                                                                             |
| Wave length (Å)                            | 0.71075                                                                                                                               | 0.71075                                                                         | 0.71075                                                                         | 0.71075                                                                                                             | 0.71075                                                                                                                                                 |
| a (Å)                                      | 12.983(5)                                                                                                                             | 25.363(5)                                                                       | 25.480(6)                                                                       | 14.352(2)                                                                                                           | 14.756(2)                                                                                                                                               |
| b (Å)                                      | 13.837(5)                                                                                                                             | 14.931(3)                                                                       | 14.606(5)                                                                       | 15.273(2)                                                                                                           | 15.299(2)                                                                                                                                               |
| c (Å)                                      | 19.824(6)                                                                                                                             | 17.644(4)                                                                       | 17.569(4)                                                                       | 18.230(3)                                                                                                           | 18.938(2)                                                                                                                                               |
| $\alpha$ (°)                               | 109.92(2)                                                                                                                             | 90                                                                              | 90                                                                              | 70.093(8)                                                                                                           | 92.515(14)                                                                                                                                              |
| $\beta$ (°)                                | 95.24(2)                                                                                                                              | 112.617(3)                                                                      | 114.161(3)                                                                      | 76.760(9)                                                                                                           | 108.315(10)                                                                                                                                             |
| $\gamma$ (°)                               | 100.09(2)                                                                                                                             | 90                                                                              | 90                                                                              | 77.769(9)                                                                                                           | 117.216(8)                                                                                                                                              |
| Volume (Å <sup>3</sup> )                   | 3252(2)                                                                                                                               | 6168(2)                                                                         | 5966(2)                                                                         | 3618(1)                                                                                                             | 3619.3(8)                                                                                                                                               |
| Z                                          | 2                                                                                                                                     | 4                                                                               | 4                                                                               | 2                                                                                                                   | 2                                                                                                                                                       |
| Density (Calculated) (g cm <sup>-3</sup> ) | 1.381                                                                                                                                 | 1.230                                                                           | 1.271                                                                           | 1.271                                                                                                               | 1.611                                                                                                                                                   |
| Absorption coefficient (mm <sup>-1</sup> ) | 0.540                                                                                                                                 | 0.305                                                                           | 0.316                                                                           | 0.273                                                                                                               | 0.410                                                                                                                                                   |
| Absorption correction                      | multi-scan                                                                                                                            | multi-scan                                                                      | multi-scan                                                                      | multi-scan                                                                                                          | multi-scan                                                                                                                                              |
| Max. and Min. transmission                 | 0.948 and 0.863                                                                                                                       | 0.976 and 0.928                                                                 | 0.987 and 0.984                                                                 | 0.995 and 0.947                                                                                                     | 0.992 and 0.930                                                                                                                                         |
| F (000)                                    | 1308                                                                                                                                  | 2396                                                                            | 2396                                                                            | 1462                                                                                                                | 1724                                                                                                                                                    |
| $\theta$ Range for data collection (°)     | 2.01 to 28.00                                                                                                                         | 1.62 to 28.00                                                                   | 2.29 to 28.00                                                                   | 1.90 to 26.5                                                                                                        | 2.12 to 26.5                                                                                                                                            |
| Index ranges                               | -17<h<17, -18<k<18, -26<l<26                                                                                                          | -33<h<33, -19<k<19, -23<l<23                                                    | -33<h<33, -19<k<19, -23<l<23                                                    | -18<h<18, -19<k<19, -22<l<22                                                                                        | -18<h<18, -19<k<19, -23<l<23                                                                                                                            |
| Reflections collected                      | 15661                                                                                                                                 | 7452                                                                            | 7218                                                                            | 14974                                                                                                               | 14590                                                                                                                                                   |
| Independent reflections                    | 12684 [R <sub>int</sub> = 0.0683]                                                                                                     | 5678 [R <sub>int</sub> = 0.0690]                                                | 6683 [R <sub>int</sub> = 0.0985]                                                | 10409 [R <sub>int</sub> = 0.0977]                                                                                   | 10094 [R <sub>int</sub> = 0.0977]                                                                                                                       |
| Refinement method                          | Full-matrix least-squares on F <sup>2</sup>                                                                                           | Full-matrix least-squares on F <sup>2</sup>                                     | Full-matrix least-squares on F <sup>2</sup>                                     | Full-matrix least-squares on F <sup>2</sup>                                                                         | Full-matrix least-squares on F <sup>2</sup>                                                                                                             |
| Data/restraints/parameters                 | 15661 / 6 / 836                                                                                                                       | 7452 / 81 / 401                                                                 | 7218 / 60 / 401                                                                 | 14974 / 0 / 922                                                                                                     | 14590 / 375 / 1163                                                                                                                                      |
| Goodness-of-fit on F <sup>2</sup>          | 1.053                                                                                                                                 | 1.142                                                                           | 1.142                                                                           | 1.046                                                                                                               | 1.046                                                                                                                                                   |
| Final R indices [I>2 $\sigma$ (I)]         | R <sub>1</sub> = 0.0683, wR <sub>2</sub> = 0.1439                                                                                     | R <sub>1</sub> = 0.0690, wR <sub>2</sub> = 0.1802                               | R <sub>1</sub> = 0.0985, wR <sub>2</sub> = 0.1941                               | R <sub>1</sub> = 0.0977, wR <sub>2</sub> = 0.1846                                                                   | R <sub>1</sub> = 0.0988, wR <sub>2</sub> = 0.2119                                                                                                       |
| R indices (all data)                       | R <sub>1</sub> = 0.0843, wR <sub>2</sub> = 0.1552                                                                                     | R <sub>1</sub> = 0.0897, wR <sub>2</sub> = 0.1975                               | R <sub>1</sub> = 0.1067, wR <sub>2</sub> = 0.1986                               | R <sub>1</sub> = 0.1382, wR <sub>2</sub> = 0.2062                                                                   | R <sub>1</sub> = 0.1373, wR <sub>2</sub> = 0.2368                                                                                                       |
| Largest peak and hole (e Å <sup>-3</sup> ) | +0.81 and -0.91                                                                                                                       | +0.29 and -0.54                                                                 | +0.57 and -0.50                                                                 | +0.56 and -0.46                                                                                                     | +0.90 and -0.51                                                                                                                                         |

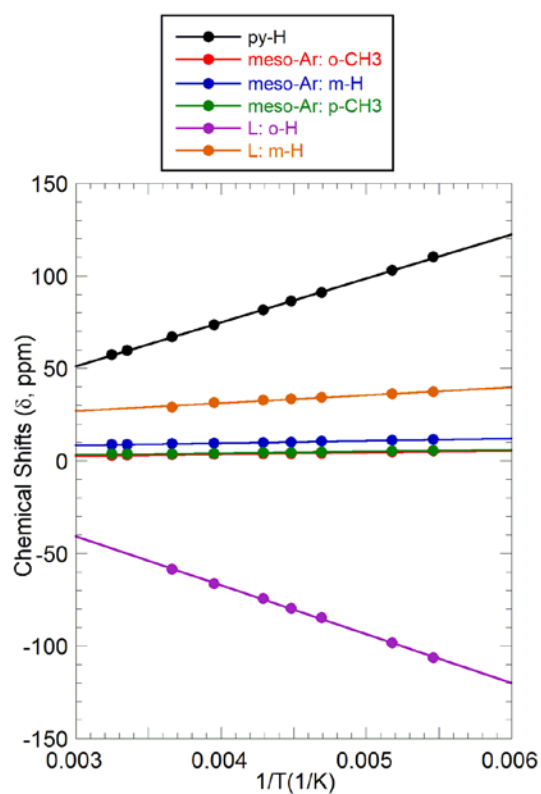

Fig. S1 Curie plots of proton signals of **1a** taken in  $\text{CD}_2\text{Cl}_2$  solution.

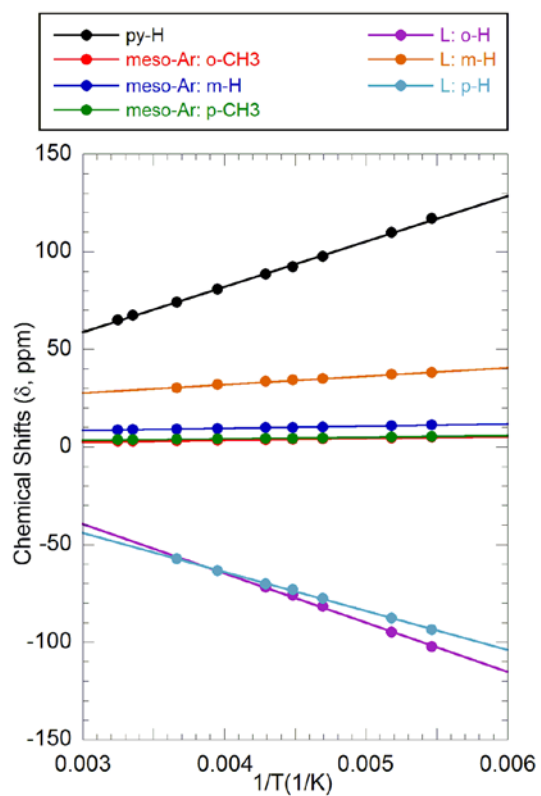

Fig. S2 Curie plots of proton signals of **1b** taken in  $\text{CD}_2\text{Cl}_2$  solution.

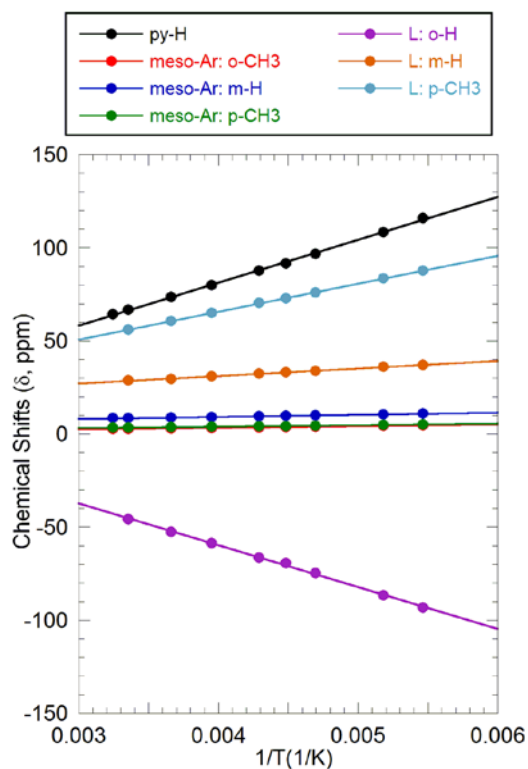

Fig. S3 Curie plots of proton signals of **1c** taken in  $\text{CD}_2\text{Cl}_2$  solution.

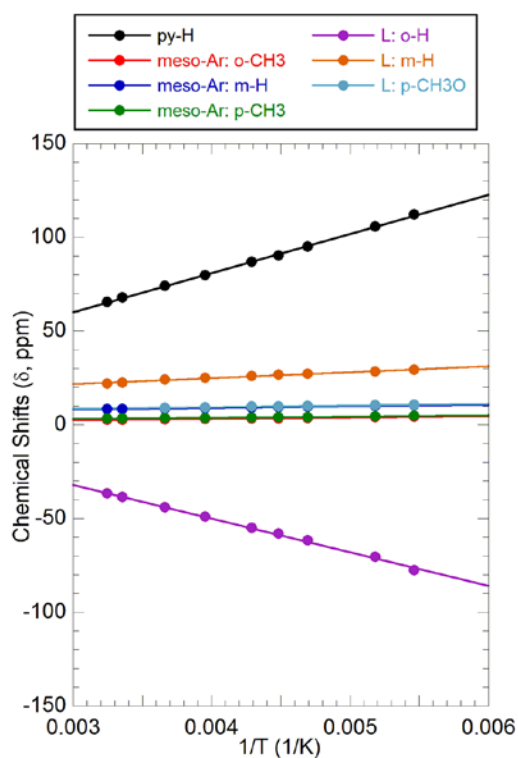

Fig. S4 Curie plots of proton signals of **1d** taken in  $\text{CD}_2\text{Cl}_2$  solution.

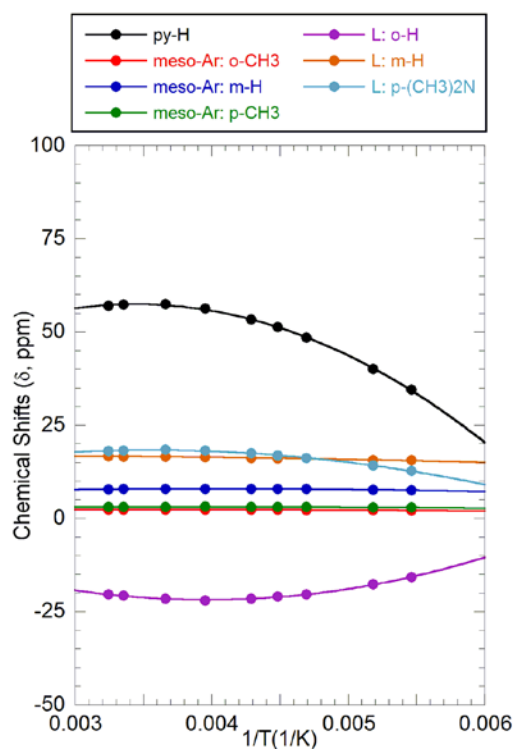

Fig. S5 Curie plots of proton signals of **1e** taken in  $\text{CD}_2\text{Cl}_2$  solution.

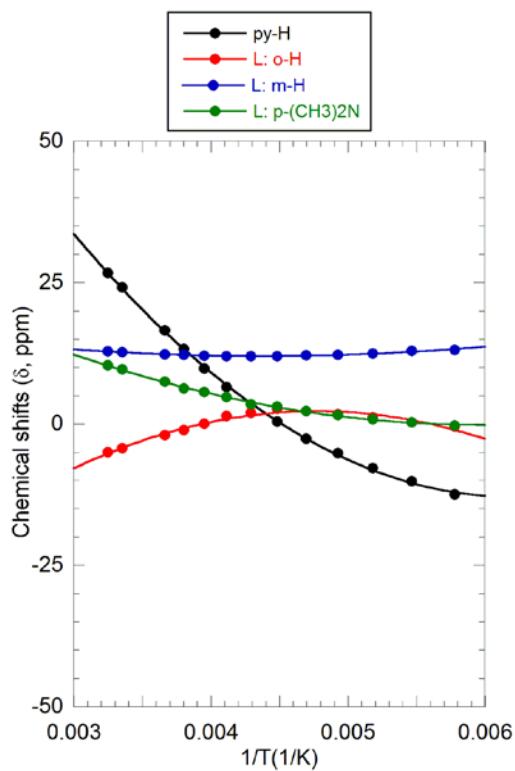

Fig. S6 Curie plots of proton signals of **2** taken in  $\text{CD}_2\text{Cl}_2$  solution.

Table S2 EPR g values of **1a-e** and **2**.

| Complex   | EPR (CH <sub>2</sub> Cl <sub>2</sub> / toluene, 15 K) |                |                | EPR (solid, 4 K) |                |                |
|-----------|-------------------------------------------------------|----------------|----------------|------------------|----------------|----------------|
|           | g <sub>1</sub>                                        | g <sub>2</sub> | g <sub>3</sub> | g <sub>1</sub>   | g <sub>2</sub> | g <sub>3</sub> |
| <b>1a</b> | 5.94                                                  | 5.94           | 1.99           | 5.62             | 5.62           | 1.98           |
| <b>1b</b> | 5.88                                                  | 5.88           | 1.99           | 5.68             | 5.68           | 1.95           |
| <b>1c</b> | 5.89                                                  | 5.89           | 1.99           | 2.41             | 2.23           | 1.92           |
| <b>1d</b> | 5.68                                                  | 5.68           | 1.99           | 2.41             | 2.23           | 1.99           |
|           | 2.41                                                  | 2.22           | 1.92           |                  |                |                |
| <b>1e</b> | 2.39                                                  | 2.21           | 1.93           | 2.41             | 2.22           | 1.93           |
| <b>2e</b> | 2.42                                                  | 2.22           | 1.92           | 2.37             | 2.19           | 1.95           |

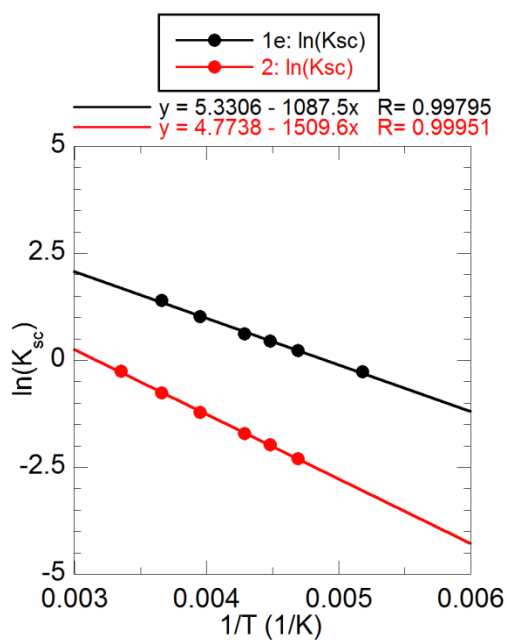

Fig. S7 Van't Hoff plots for **1e**(black) and **2**(red).

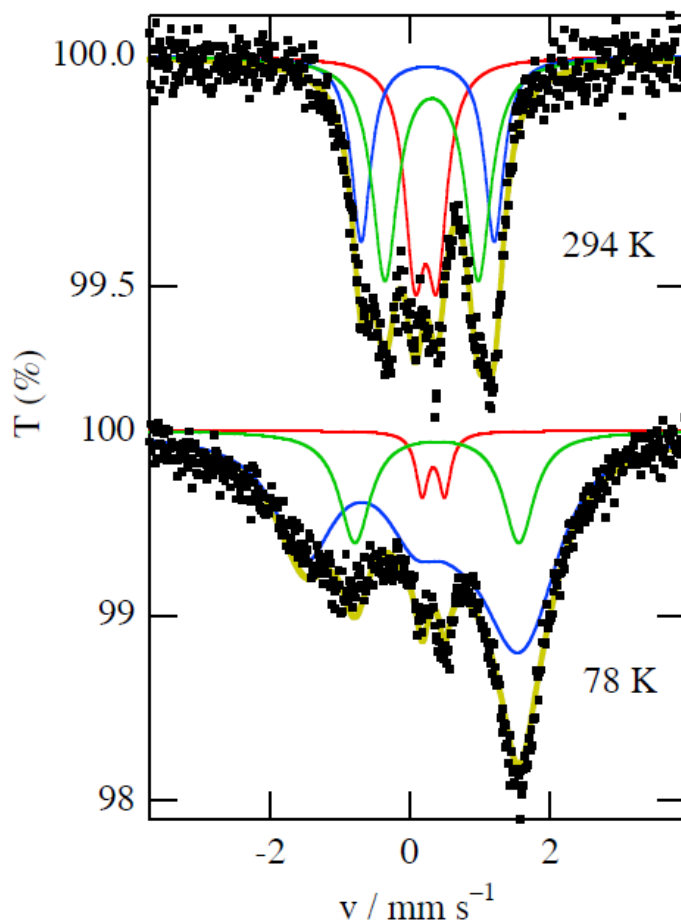

Fig. S8  $^{57}\text{Fe}$  Mössbauer spectra of **1e** taken for a microcrystalline sample at 294 (upper) and 78 K (lower).

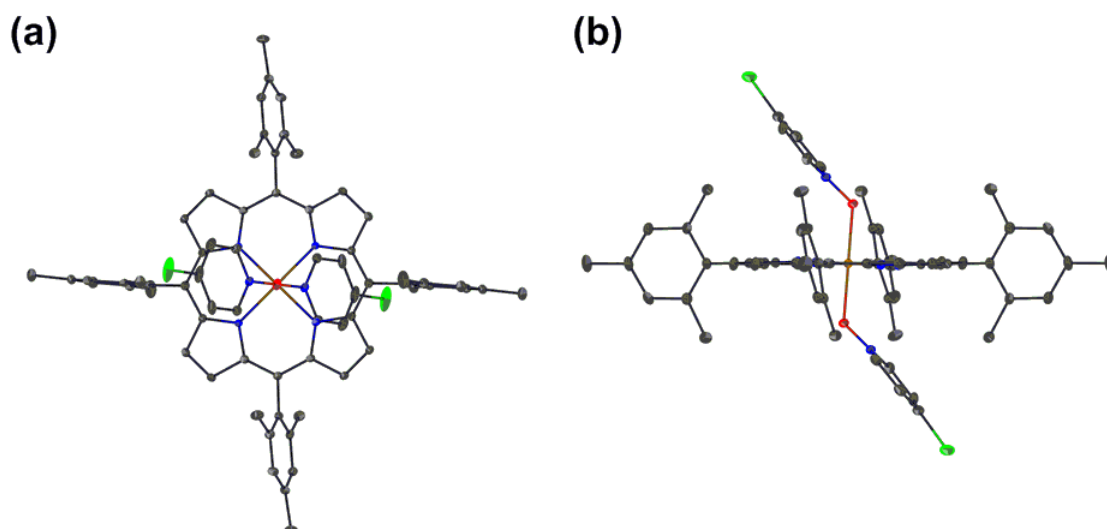

Fig. S9 ORTEP drawing of **1a**·2CH<sub>2</sub>Cl<sub>2</sub> (100 K) seen along the: (a) O-Fe-O and (b) N-Fe-N axis, showing the thermal ellipsoids at 30% probability level. Hydrogen, solvent, and counter anion atoms are omitted for clarity.

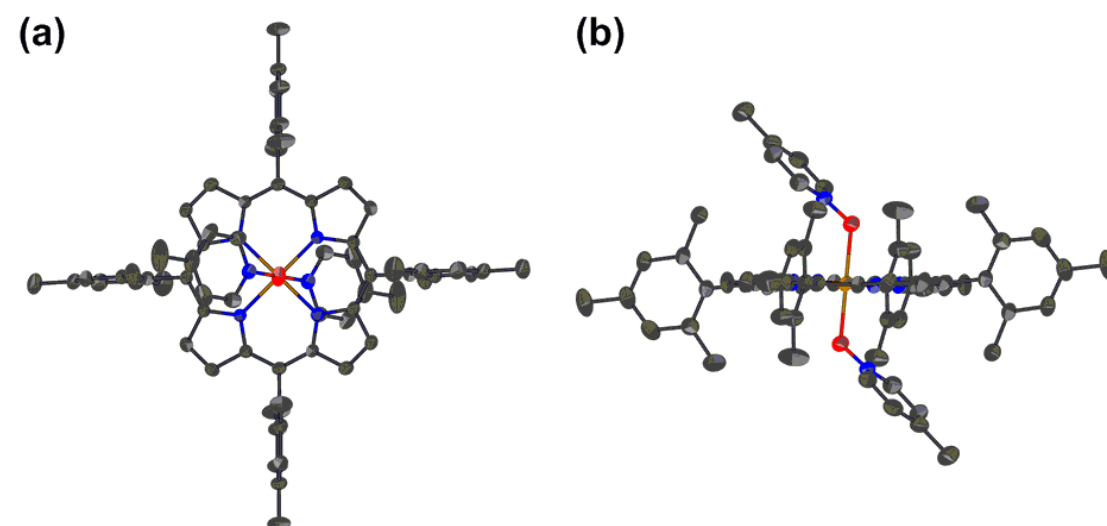

Fig. S10 ORTEP drawing of **1c** (300 K) seen along the: (a) O-Fe-O and (b) N-Fe-N axis, showing the thermal ellipsoids at 30% probability level. Hydrogen, solvent, and counter anion atoms are omitted for clarity.

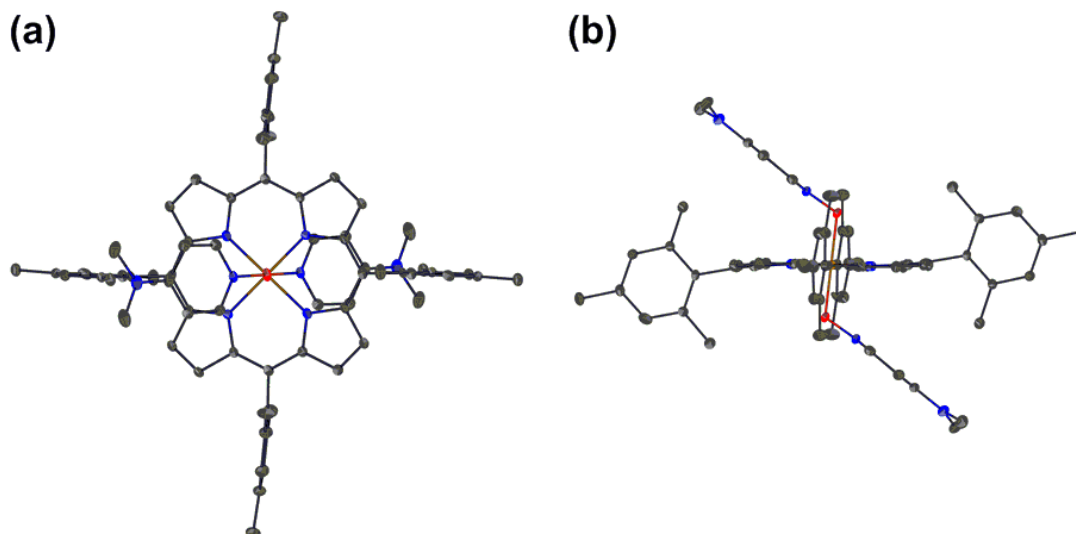

Fig. S11 ORTEP drawing of **1e**·2toluene (100 K) seen along the: (a) O-Fe-O and (b) N-Fe-N axis, showing the thermal ellipsoids at 30% probability level. Hydrogen, solvent, and counter anion atoms are omitted for clarity.

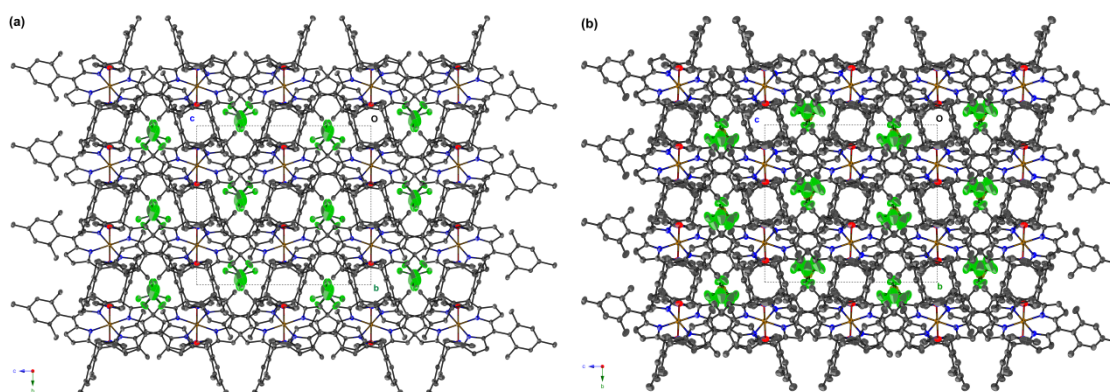

Fig. S12 Crystal packing diagrams of **1c** viewed along with the a axis at 100K(a) and 300K(b).

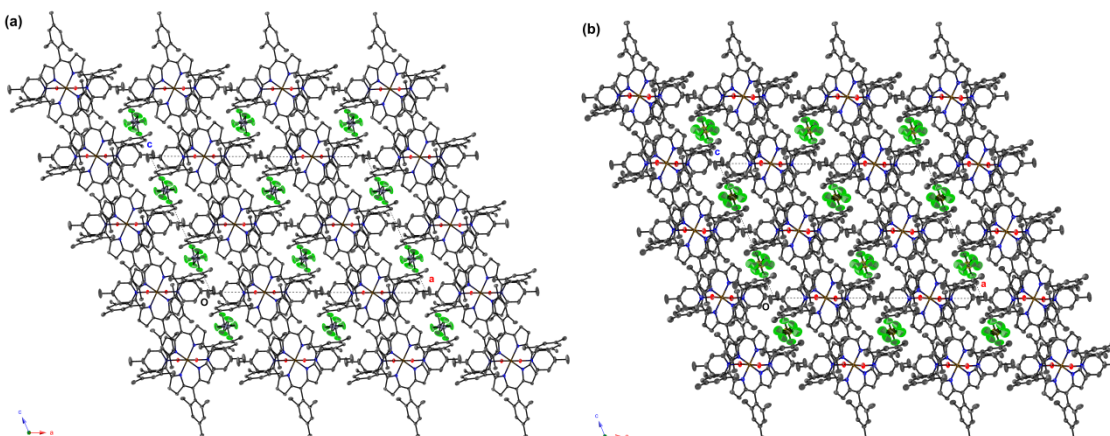

Fig. S13 Crystal packing diagrams of **1c** viewed along with the b axis at 100K(a) and 300K(b).

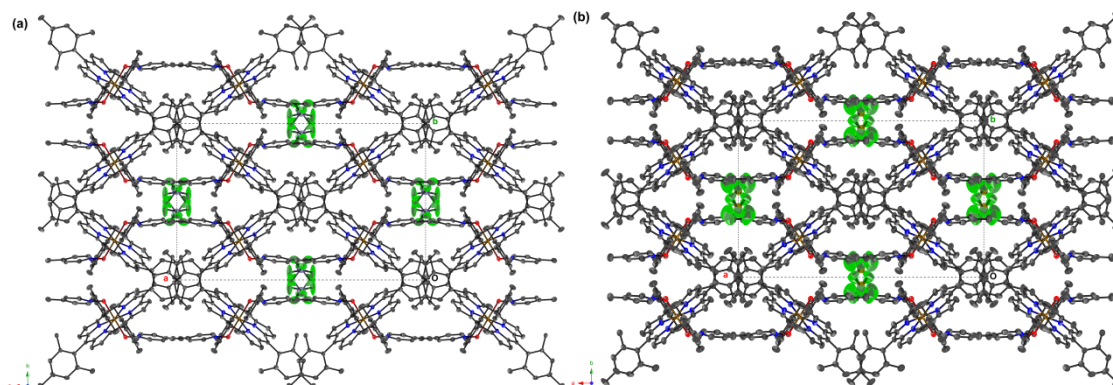

Fig. S14 Crystal packing diagrams of **1c** viewed along with the *c* axis at 100K(a) and 300K(b).

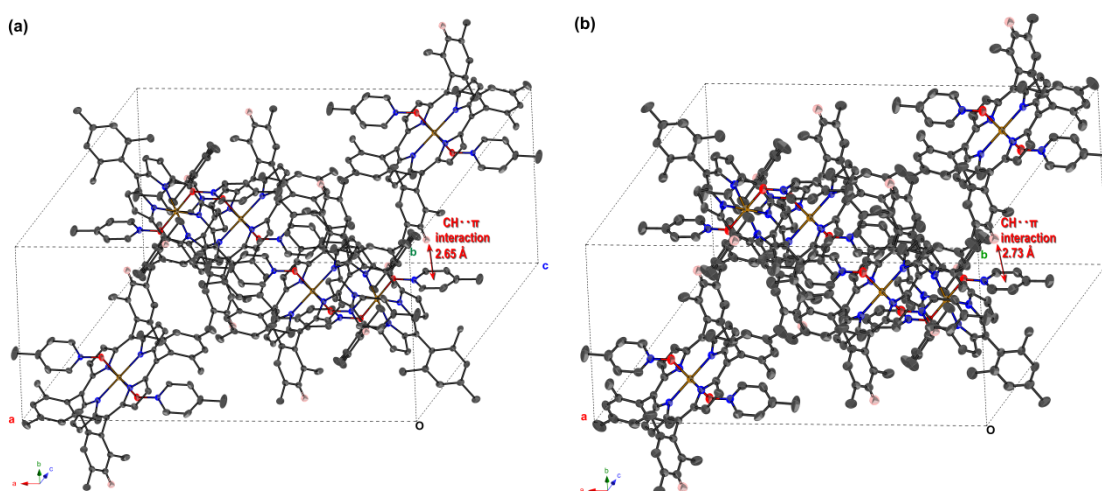

Fig. S15 Crystal packing diagrams of **1c** for one unit cell at 100K(a) and 300K(b).

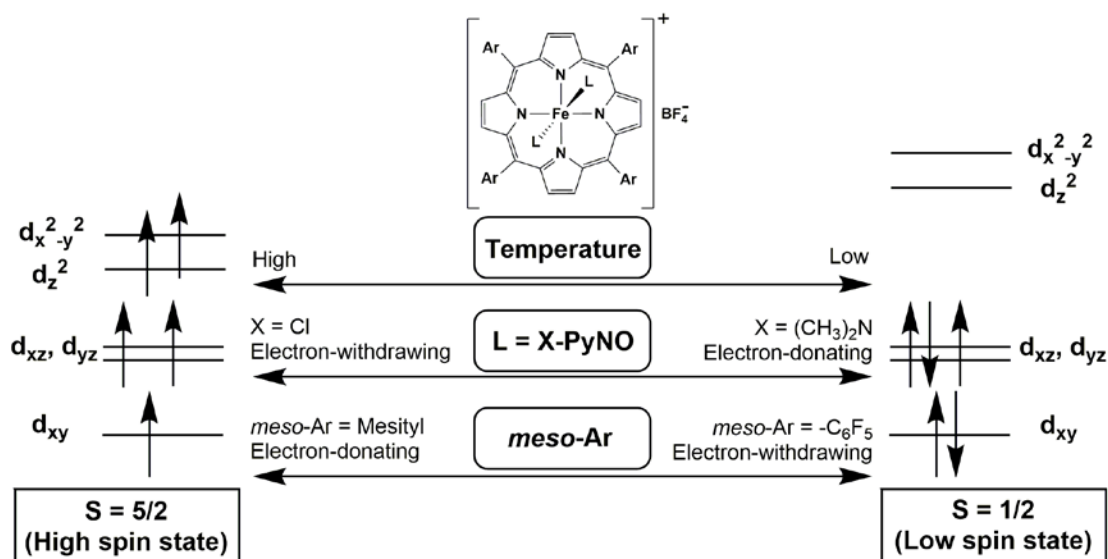

Scheme S1 Spin crossover between  $S=5/2$ (high spin state) and  $S=1/2$ (low spin state) for these Fe(III) porphyrin complexes.
