# Supplementary material for: Spin-crossover between high-spin (S = 5/2) and low-spin (S = 1/2) states in six-coordinate iron(iii) porphyrin complexes having two pyridine-N oxide derivatives
Source: Royal Society of Chemistry journal article supplement (doi:10.1039/c6dt03859j), 2016-11-28
Supplement: c6dt03859j2.pdf [file c6dt03859j2.pdf]

Table 1 <sup>1</sup>H and <sup>19</sup>F NMR chemical shifts of **1a-e** and **2** taken in CD<sub>2</sub>Cl<sub>2</sub> (δ, ppm)

| Complex   | Porphyrin |                           |                   |                           | Axial Ligands      |                   |                          |
|-----------|-----------|---------------------------|-------------------|---------------------------|--------------------|-------------------|--------------------------|
|           | py-H      | <i>o</i> -CH <sub>3</sub> | <i>m</i> -H       | <i>p</i> -CH <sub>3</sub> | <i>o</i> -H        | <i>m</i> -H       | <i>p</i> -X <sup>a</sup> |
| (a)298 K  |           |                           |                   |                           |                    |                   |                          |
| <b>1a</b> | 59.8      | 3.0                       | 8.9               | 3.7                       | -50.0 <sup>b</sup> | 28.4 <sup>b</sup> | -                        |
| <b>1b</b> | 63.6      | 2.9                       | 8.8               | 3.6                       | -48.5 <sup>b</sup> | 29.2 <sup>b</sup> | (-51.2) <sup>b</sup>     |
| <b>1c</b> | 66.8      | 2.8                       | 8.7               | 3.5                       | -45.7              | 28.8              | (56.0)                   |
| <b>1d</b> | 67.8      | 2.7                       | 8.4               | 3.4                       | -38.6              | 22.4              | (3.7)                    |
| <b>1e</b> | 57.4      | 2.3                       | 7.8               | 3.0                       | -20.7              | 16.5              | (18.2)                   |
| <b>2</b>  | 24.1      | -140 <sup>c</sup>         | -164 <sup>c</sup> | -154 <sup>c</sup>         | -4.3               | 12.7              | (9.6)                    |
| (b)183 K  |           |                           |                   |                           |                    |                   |                          |
| <b>1a</b> | 110.2     | 5.3                       | 11.7              | 5.7                       | -106.5             | 37.3              | -                        |
| <b>1b</b> | 113.7     | 5.1                       | 11.3              | 5.4                       | -102.3             | 38.1              | (-93.6)                  |
| <b>1c</b> | 115.9     | 4.7                       | 11.0              | 5.2                       | -93.3              | 37.0              | (87.8)                   |
| <b>1d</b> | 112.3     | 4.3                       | 10.5              | 4.8                       | -77.6              | 29.2              | (3.2)                    |
| <b>1e</b> | 34.5      | 2.1                       | 7.5               | 2.9                       | -15.7              | 15.3              | (12.8)                   |
| <b>2</b>  | -10.2     | -142 <sup>c</sup>         | -165 <sup>c</sup> | -155 <sup>c</sup>         | 0.3                | 12.8              | (0.3)                    |

<sup>a</sup>Chemical shifts of the *para* substituents.

<sup>b</sup>Extrapolated from low temperature. <sup>c</sup><sup>19</sup>F NMR chemical shifts.

Table 2. Selected structural parameters for **1a-e** and **2**.

| Complex   | T (K) | Fe-N <sup>a</sup> | Fe-O <sup>a</sup> | N-O <sup>a</sup> | Fe-O-N <sup>b</sup> | θ <sup>c</sup> |
|-----------|-------|-------------------|-------------------|------------------|---------------------|----------------|
| <b>1a</b> | 100   | 2.054(2)          | 2.047(3)          | 1.337(3)         | 125.3(2)            | 9.0            |
| <b>1c</b> | 300   | 2.048(2)          | 2.048(2)          | 1.336(6)         | 123.7(1)            | 7.8            |
|           | 100   | 2.029(3)          | 2.001(2)          | 1.347(4)         | 122.0(2)            | 9.1            |
| <b>1e</b> | 100   | 1.997(4)          | 1.904(3)          | 1.364(6)         | 120.2(2)            | 9.1            |
| <b>2</b>  | 100   | 1.996(6)          | 1.908(3)          | 1.368(7)         | 119.7(3)            | 6.2            |

<sup>a</sup>Averaged bond lengths(Å). <sup>b</sup>Averaged angles(°).

<sup>c</sup>Averaged angles between heme normal and Fe-O bonds.
